# Supplementary material for: Polo-like kinase 1 is related with malignant characteristics and inhibits macrophages infiltration in glioma
Source: Front Immunol. 2022 Dec 21;13:1058036. doi: 10.3389/fimmu.2022.1058036 (PMC9811677; doi:10.3389/fimmu.2022.1058036)
Supplement: Supplementary Table 1 — Clinical data of glioma patients. [file Table_1.xlsx]

## Sheet: Sheet1
Supplementary Table 1. Clinical data of glioma patients
Patient ID	Pathology ID	Gender	Age	Grade	IDH mutations Yes=1; No=0	IDH1 mutation Yes=1; No=0	IDH2 mutation Yes=1; No=0	1p-deletion Yes=1; No=0	19q-deietion Yes=1; No=0	1p19q-codeletion Yes=1; No=0	Ki67	TERTp mutation Yes=1; No=0	p53 mutation Yes=1;No=0	ATRX mutation Yes=1; No=0
1319772	2018-94255	male	62	II	1	0	1	1	1	1	3%+	1	0	0
2754803	2019-029692	male	30	II	1	1	0	1	1	1	3%+	1	1	1
3279182	2019-036116	male	66	II	1	1	0	1	1	1	NA	1	0	0
3311481	2018-92081	male	42	II	1	1	0	0	1	0	10%+	0	1	1
3313941	2018-90043	male	53	II	1	1	0	1	1	1	10%+	1	1	1
3323161	2018-93812	female	55	II	1	1	0	1	1	1	5%+	1	1	1
3326132	2018-93645	female	67	II	1	1	0	0	0	0	3%+	0	70%+	1
3350346	2018-101240	female	25	II	1	1	0	0	0	0	3%+	0	0	1
3358439	2018-103484	male	55	II	1	1	0	0	0	0	10%+	0	40%+	1
3367008	2018-107104	male	36	II	1	1	0	0	1	0	10%+	0	80%+	0
3369277	2018-106521	male	53	II	1	1	0	1	1	1	5%+	1	0.01	0
3371401	2018-107976	male	38	II	1	1	0	1	1	1	10%+	0	0	1
3379869	2019-005332	male	31	II	1	1	0	1	1	1	10%+	1	0	1
3379898	2018-109842	male	61	II	1	1	0	0	0	0	10%+	0	80%+	1
3383560	2018-111176	male	59	II	1	1	0	1	1	1	10%+	1	10%+	1
3384440	2019-000519	female	28	II	1	1	0	1	1	1	5%+	1	1	1
3389489	2019-001918	female	49	II	1	1	0	1	1	1	5%+	1	0	1
3393117	2019-002437	female	40	II	1	1	0	1	0	0	2%+	0	0	0
3459001	2019-022660	female	72	II	1	1	0	0	1	0	2%+	0	1	1
3469758	2019-025737	male	50	II	1	1	0	0	1	0	2%+	0	0	1
3475747	2019-031409	male	51	II	1	1	0	0	0	0	20%+	0	1	1
3476949	2019-029926	male	57	II	1	1	0	0	1	0	5%+	0	0	0
3479592	ES19-04749	male	66	II	1	1	0	0	0	0	5%+	0	1	1
3479633	2019-030440	male	35	II	1	0	1	0	0	0	5%+	0	1	1
3481399	2019-029925	female	56	II	1	1	0	1	1	1	2%+	1	10%+	1
3484026	2019-031191	female	62	II	1	1	0	0	0	0	3%+	0	0	1
3493640	2019-033647	female	58	II	1	1	0	1	1	1	5%+	1	0	1
3495373	2019-033846	male	44	II	1	1	0	1	1	1	5%+	1	10%+	0
3496872	2019-037324	male	37	II	1	1	0	1	1	1	20%+	1	10%+	1
3499689	ES19-05883	male	55	II	1	1	0	0	1	0	5%+	0	50%+	1
3500408	ES19-05956	male	63	II	1	1	0	1	1	1	5%+	1	0	1
3501025	2019-035898	male	49	II	1	1	0	0	0	0	3%+	0	30%+	1
3501277	2019-037575	male	77	II	1	1	0	1	1	1	5%+	1	30%+	1
3504250	2019-039305	female	47	III	1	1	0	1	1	1	20%+	1	0	0
3508488	2019-039819	male	34	III	1	1	0	1	1	1	20%+	1	1	1
3508897	2019-039104	male	54	III	1	1	0	1	1	1	30%+	1	1	1
3510288	2019-039083	female	49	III	1	1	0	0	1	0	10%+	0	0	1
3511752	ES19-06275	female	40	III	1	0	1	1	1	1	30%+	1	10%+	1
3514071	2019-041714	female	63	III	1	1	0	0	0	0	10%+	0	50%+	1
3517143	2019-043266	male	44	III	1	1	0	1	1	1	10%+	0	0	0
3519576	2019-043319	female	74	III	1	1	0	1	1	1	10%+	1	5%+	0
3521018	2019-043325	female	67	III	1	0	1	1	1	1	20%+	1	1	1
3521531	2019-042806	male	30	III	1	1	0	1	1	1	20%+	1	0	1
3524987	2019-043834	female	71	III	1	1	0	0	0	0	15%+	0	1	0
3528635	2019-047480	female	42	III	1	1	0	1	1	1	8%+	1	0	0
3529389	2019-045531	male	59	III	1	1	0	1	1	1	20%+	1	0	1
3529536	2019-045561	male	46	III	1	1	0	0	0	0	20%+	0	0	0
3530724	2019-046359	male	60	III	1	1	0	1	1	1	3%+	1	0	1
3530886	2019-045560	female	28	III	1	1	0	1	1	1	40%+	1	0	1
3531323	2019-046360	female	69	III	1	1	0	0	1	0	30%+	0	80%+	0
3531836	2019-046095	male	45	IV	0	0	0	0	0	0	20%+	0	0	0
3533382	2019-046567	male	46	IV	0	0	0	0	0	0	10%+	0	0	1
3535093	2019-046789	female	36	IV	0	0	0	0	0	0	30%+	1	0	0
3536208	ES19-07544	male	49	IV	0	0	0	0	0	0	90%+	1	1	1
3536424	ES19-07719	female	30	IV	0	0	0	0	0	0	30%+	0	1	1
3537805	2019-048470	male	50	IV	0	0	0	0	0	0	50%+	1	0	0
3539182	ES19-07665	male	33	IV	0	0	0	0	0	0	50%+	1	0	0
3540860	2019-049175	female	50	IV	1	1	0	0	0	0	70%+	0	1	1
3541925	2019-052767	female	51	IV	0	0	0	0	0	0	30%+	0	5%+	1
3542962	ES19-07936	female	64	IV	0	0	0	0	0	0	15%+	1	30%+	1
3543020	2019-051153	female	45	IV	0	0	0	0	0	0	50%+	1	0	0
3547298	ES19-08158	female	26	IV	0	0	0	0	0	0	40%+	1	1	1
3547308	2019-053904	male	49	IV	0	0	0	0	0	0	40%+	1	0	0
3547784	2019-054333	female	45	IV	0	0	0	0	0	0	70%+	1	0	0
3557371	2019-055824	male	74	IV	0	0	0	0	0	0	20%+	1	0	0
3570532	2019-058966	male	50	IV	0	0	0	0	0	0	40%+	1	40%+	0
3571709	2019-059809	male	51	IV	0	0	0	0	0	0	30%+	1	10%+	1
3574398	ES19-09451	female	48	IV	0	0	0	0	0	0	5%+	1	20%+	0
3574537	2019-062313	female	56	IV	0	0	0	0	0	0	25%+	1	90%+	1
3578065	ES19-09747	female	72	IV	0	0	0	0	0	0	30%+	0	90%+	1
3581240	2019-062662	male	46	IV	0	0	0	0	0	0	50%+	1	1	1
3582765	2019-062652	female	34	IV	0	0	0	0	0	0	25%+	0	0	0
3583139	2019-063615	female	71	IV	0	0	0	0	0	0	40%+	1	15%+	1
3584805	2019-064138	female	18	IV	0	0	0	0	0	0	25%+	1	20%+	1
3585713	2019-068052	male	49	IV	0	0	0	0	0	0	40%+	1	1	1
3588011	2019-065292	female	36	IV	0	0	0	0	0	0	25%+	1	20%+	1
3591713	2019-065289	female	30	IV	1	1	0	0	0	0	15%+	0	40%+	0
3599871	ES19-10783	female	78	IV	0	0	0	0	0	0	50%+	0	80%+	1
3600054	2019-067806	male	39	IV	1	1	0	0	0	0	50%+	0	1	0
3602726	2019-072169	male	48	IV	0	0	0	0	0	0	10%+	1	1	1
3608868	ES19-11363	female	54	IV	0	0	0	0	0	0	40%+	1	0	0
3609857	2019-072657	female	47	IV	0	0	0	0	0	0	50%+	1	0	1
3623436	ES19-12402	female	19	IV	0	0	0	0	0	0	60%+	0	0	0
3626519	ES19-12447	male	78	IV	0	0	0	0	0	0	40%+	1	1	1
3626914	2019-077740	male	58	IV	0	0	0	0	0	0	40%+	1	1	1
3628846	2019-083438	male	42	IV	0	0	0	0	0	0	40%+	0	1	1
3629514	ES19-12639	female	50	IV	0	0	0	0	0	0	30%+	0	10%+	1
3634430	2019-082574	male	38	IV	0	0	0	0	0	0	10%+	1	1	1
3637878	ES19-13055	female	64	IV	0	0	0	0	0	0	40%+	0	0	0
3639477	2019-081668	male	25	IV	0	0	0	0	0	0	40%+	0	1	1
3640564	FY19-16022	male	27	IV	1	1	0	0	0	0	30%+	0	60%+	1
3643410	ES19-13659	female	36	IV	0	0	0	0	0	0	30%+	1	1	1
3646361	2019-083230	male	49	IV	0	0	0	0	0	0	20%+	0	30%+	1
3647383	ES19-13607	male	25	IV	0	0	0	0	0	0	20%+	1	1	1
3649372	ES19-13740	female	56	IV	0	0	0	0	0	0	50%+	0	70%+	0
3650599	2019-085495	female	69	IV	0	0	0	0	0	0	30%+	1	60%+	1
3652984	ES19-14277	female	33	IV	0	0	0	0	0	0	40%+	0	1	1
3689193	2019-099588	female	45	IV	0	0	0	0	0	0	10%+	1	15%+	1
3695655	2019-100108	female	48	IV	0	0	0	0	0	0	40%+	0	60%+	1
3707789	2019-104922	male	53	IV	0	0	0	0	0	0	40%+	0	1	1

## Sheet: Sheet2
Patient ID	PLK1	Death Yes=1; No=0	OS(Months)
3481399	62	0	38.3
3639477	65	0	34.73
3389489	68	0	40.3333
3585713	72	0	22.36
3629514	75	0	33.1
3547308	101	0	35.3667
3608868	113	0	22
3521018	122	0	36.3333
3628846	125	0	32.7
3508488	128	1	12
3574398	130	0	35.58
3634430	133	0	32.7667
3499689	143	0	25.2
3649372	147	0	21
3609857	159	1	14.4
3496872	160	1	9
3536208	185	0	37
3647383	186	0	34
3384440	201	0	29.3
3540860	210	0	36
3367008	215	0	41.0333
3539182	218	0	36.33
3528635	235	0	25.1
3581240	238	0	35.3
3476949	239	0	26.4
3582765	241	0	34.69
3479592	246	0	38.21
3311481	256	0	42.6
3511752	264	0	36.6667
3379869	267	1	23.2
3689193	276	0	30.9667
2754803	281	0	32.8
3588011	290	1	18.7
3535093	300	0	36.0333
3350346	309	0	30.5
3495373	341	0	38
3369277	342	0	29.9
3504250	358	0	36.7333
3371401	388	0	41.76
3600054	392	0	34.24
3479633	419	0	38.27
3475747	453	0	37.57
3646361	462	0	32.7
3358439	523	0	41.4333
3521531	535	0	36.3667
3578065	556	1	18.9
3652984	566	0	33.15
3323161	588	0	41.7
3531836	663	0	36.18
3514071	671	1	19
3542962	674	1	11.2
3643410	684	0	32.6
3637878	694	0	32
3279182	700	1	14.8
3599871	705	1	9.4
3571709	709	1	1
3547784	710	1	4
3529536	713	0	35.4
3537805	722	1	4.2
3530724	747	1	25.2
3469758	793	1	18.2
3484026	821	1	16.7
3541925	840	1	14
3695655	878	0	26.2
3707789	880	0	31.33
3574537	1023	1	9
3529389	1077	0	35.4
3530886	1118	1	11.2
3508897	1129	0	36
3557371	1134	1	6.2
3543020	1220	0	36.42
3459001	1235	1	32.8
3536424	1276	0	36
3650599	1289	1	4
3583139	1309	1	3
3393117	1339	1	8.5
3531323	1376	1	13
3626519	1384	1	4
1319772	1426	0	37.6
3510288	1464	1	3.7
3517143	1478	1	4
3602726	1525	1	9.1
3591713	1536	1	8
3379898	1547	0	40.1
3519576	1706	0	14.3
3326132	1772	1	8.8
3500408	1849	1	22.2
3570532	1920	1	6
3547298	1952	1	8
3313941	1998	1	13.5
3640564	2052	1	14
3533382	2079	0	15.3
3493640	2102	1	5
3383560	2437	1	18.2
3524987	2599	1	21
3623436	2661	0	32.5
3626914	2794	1	2.3
3501025	2935	0	16.3
3501277	3005	1	4
3584805	3105	1	7.4
